# Supplementary material
Source: Springer Nature journal article supplement (https://www.springermedizin.de/resource/supplementary/12943_2011_1063_MOESM2_ESM.pdf/9552188)
Supplement: MOESM2 [file 9552188]

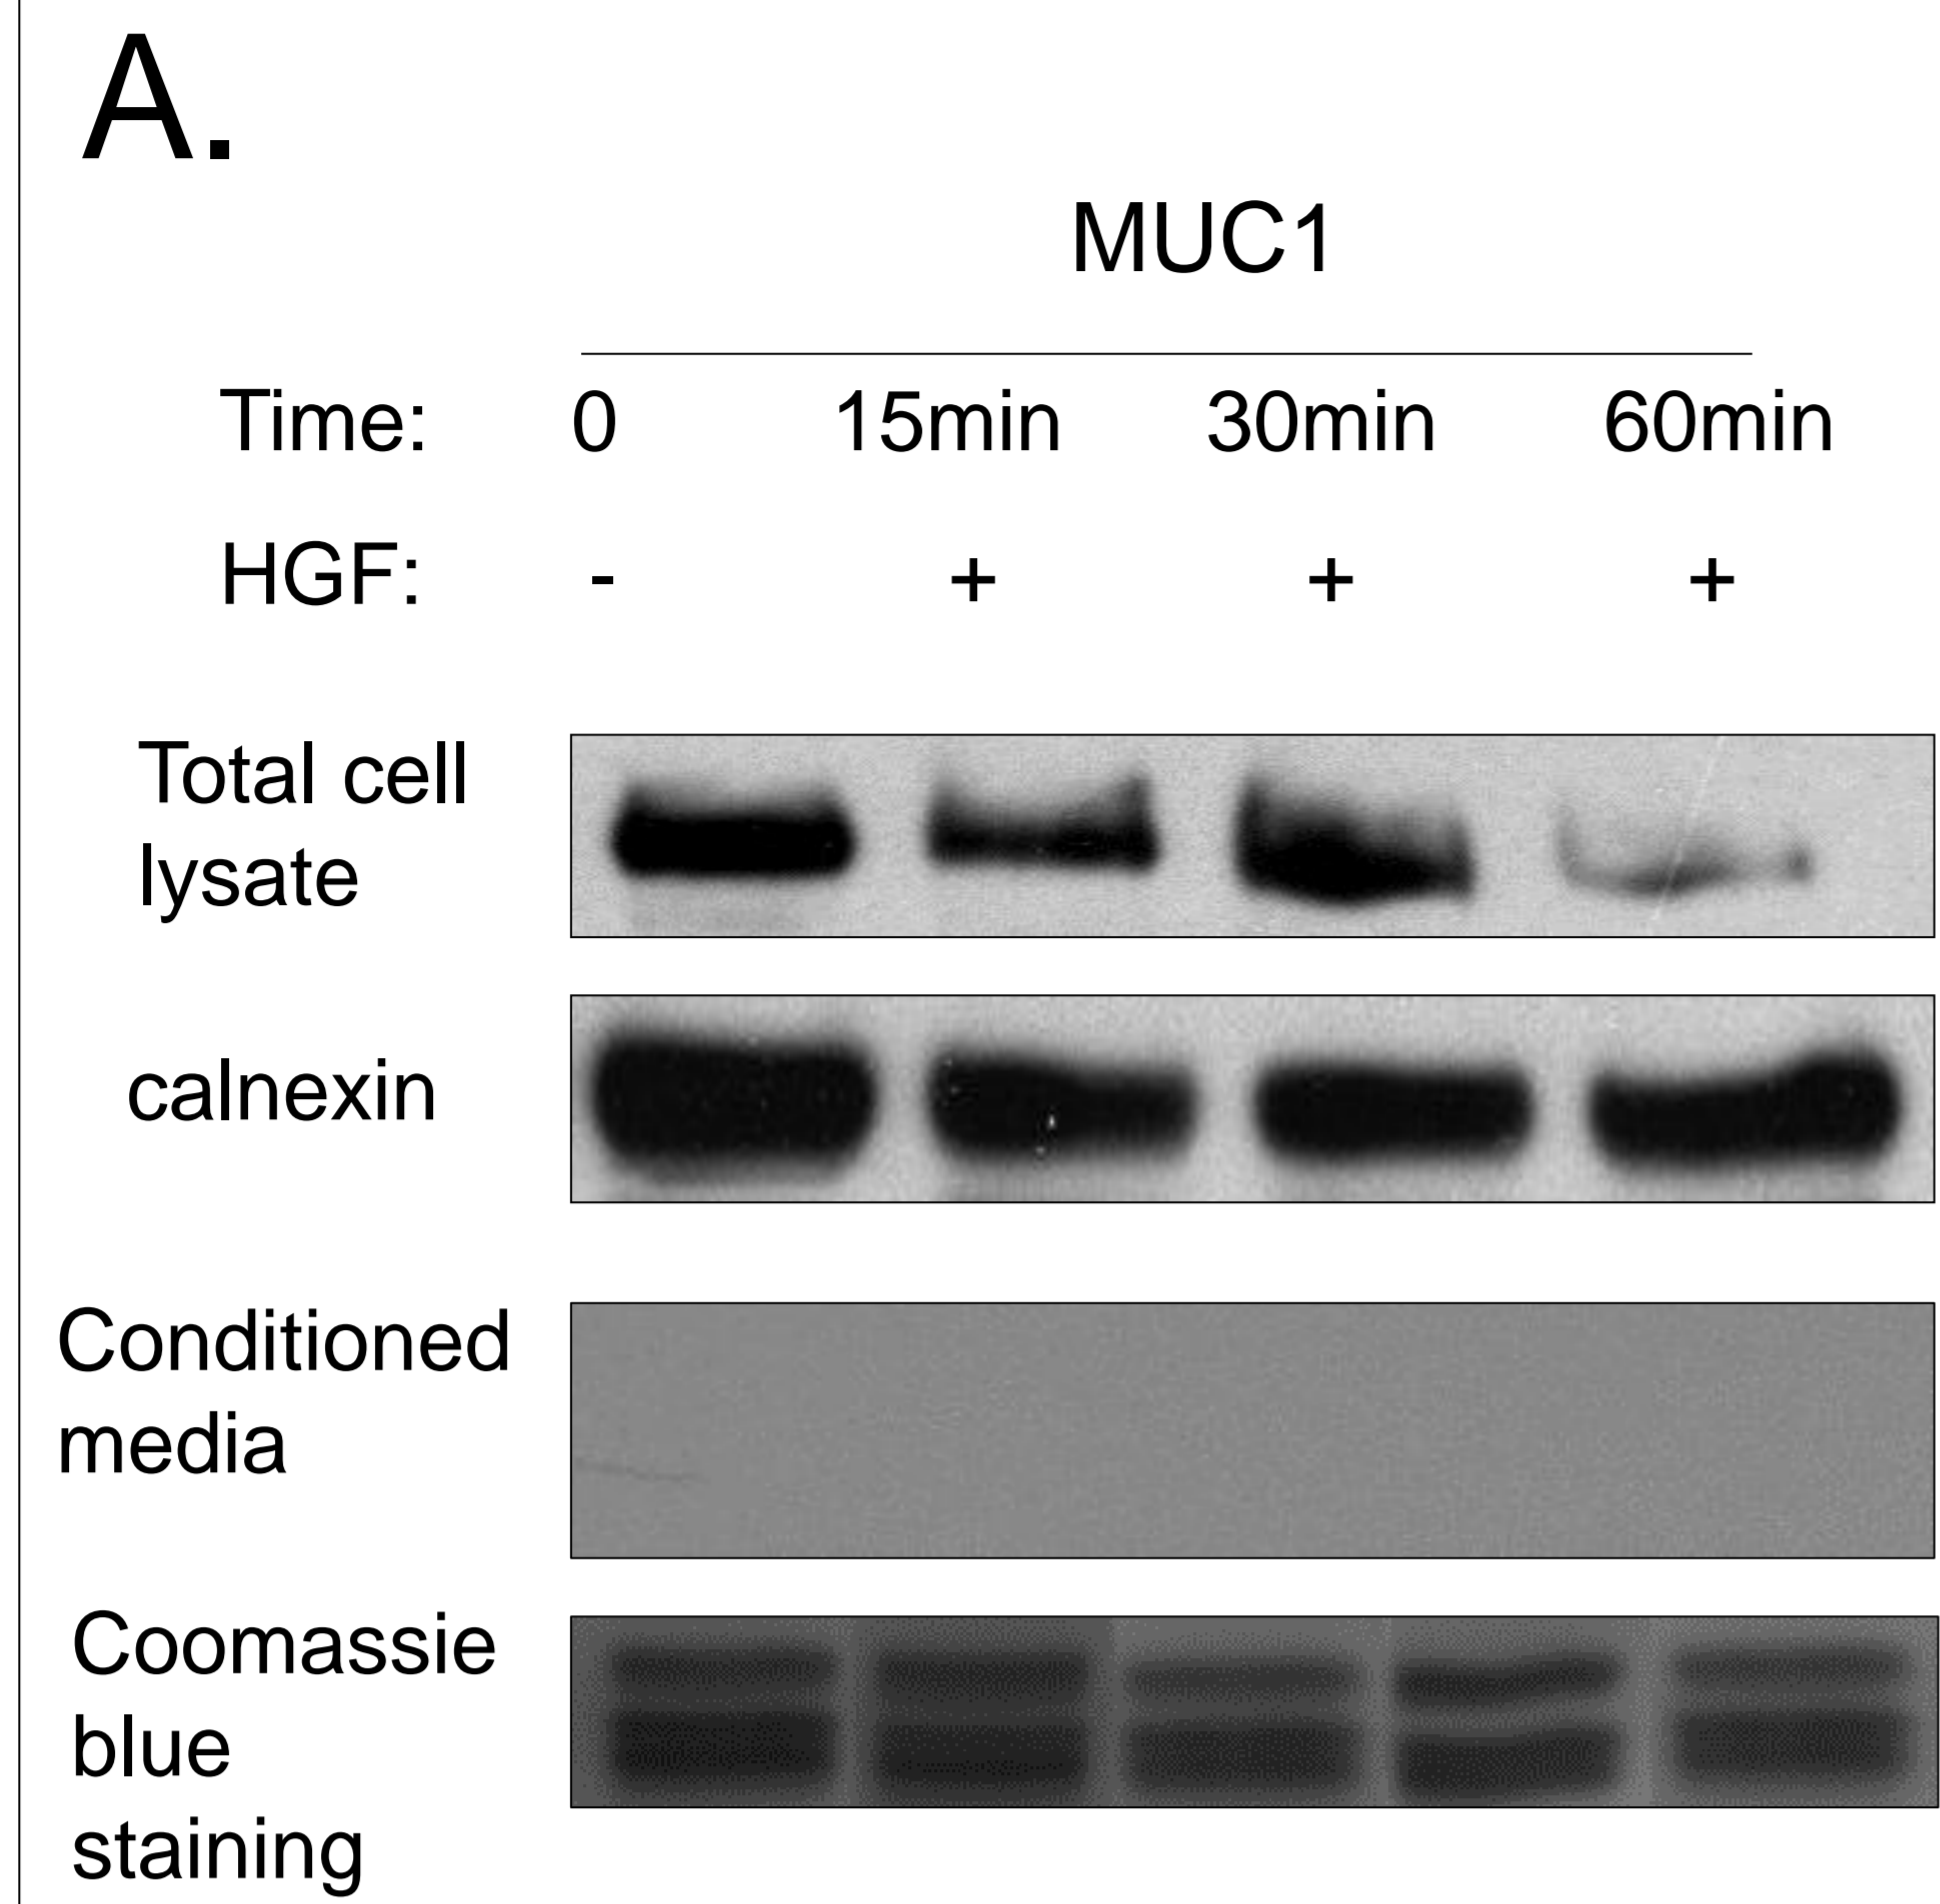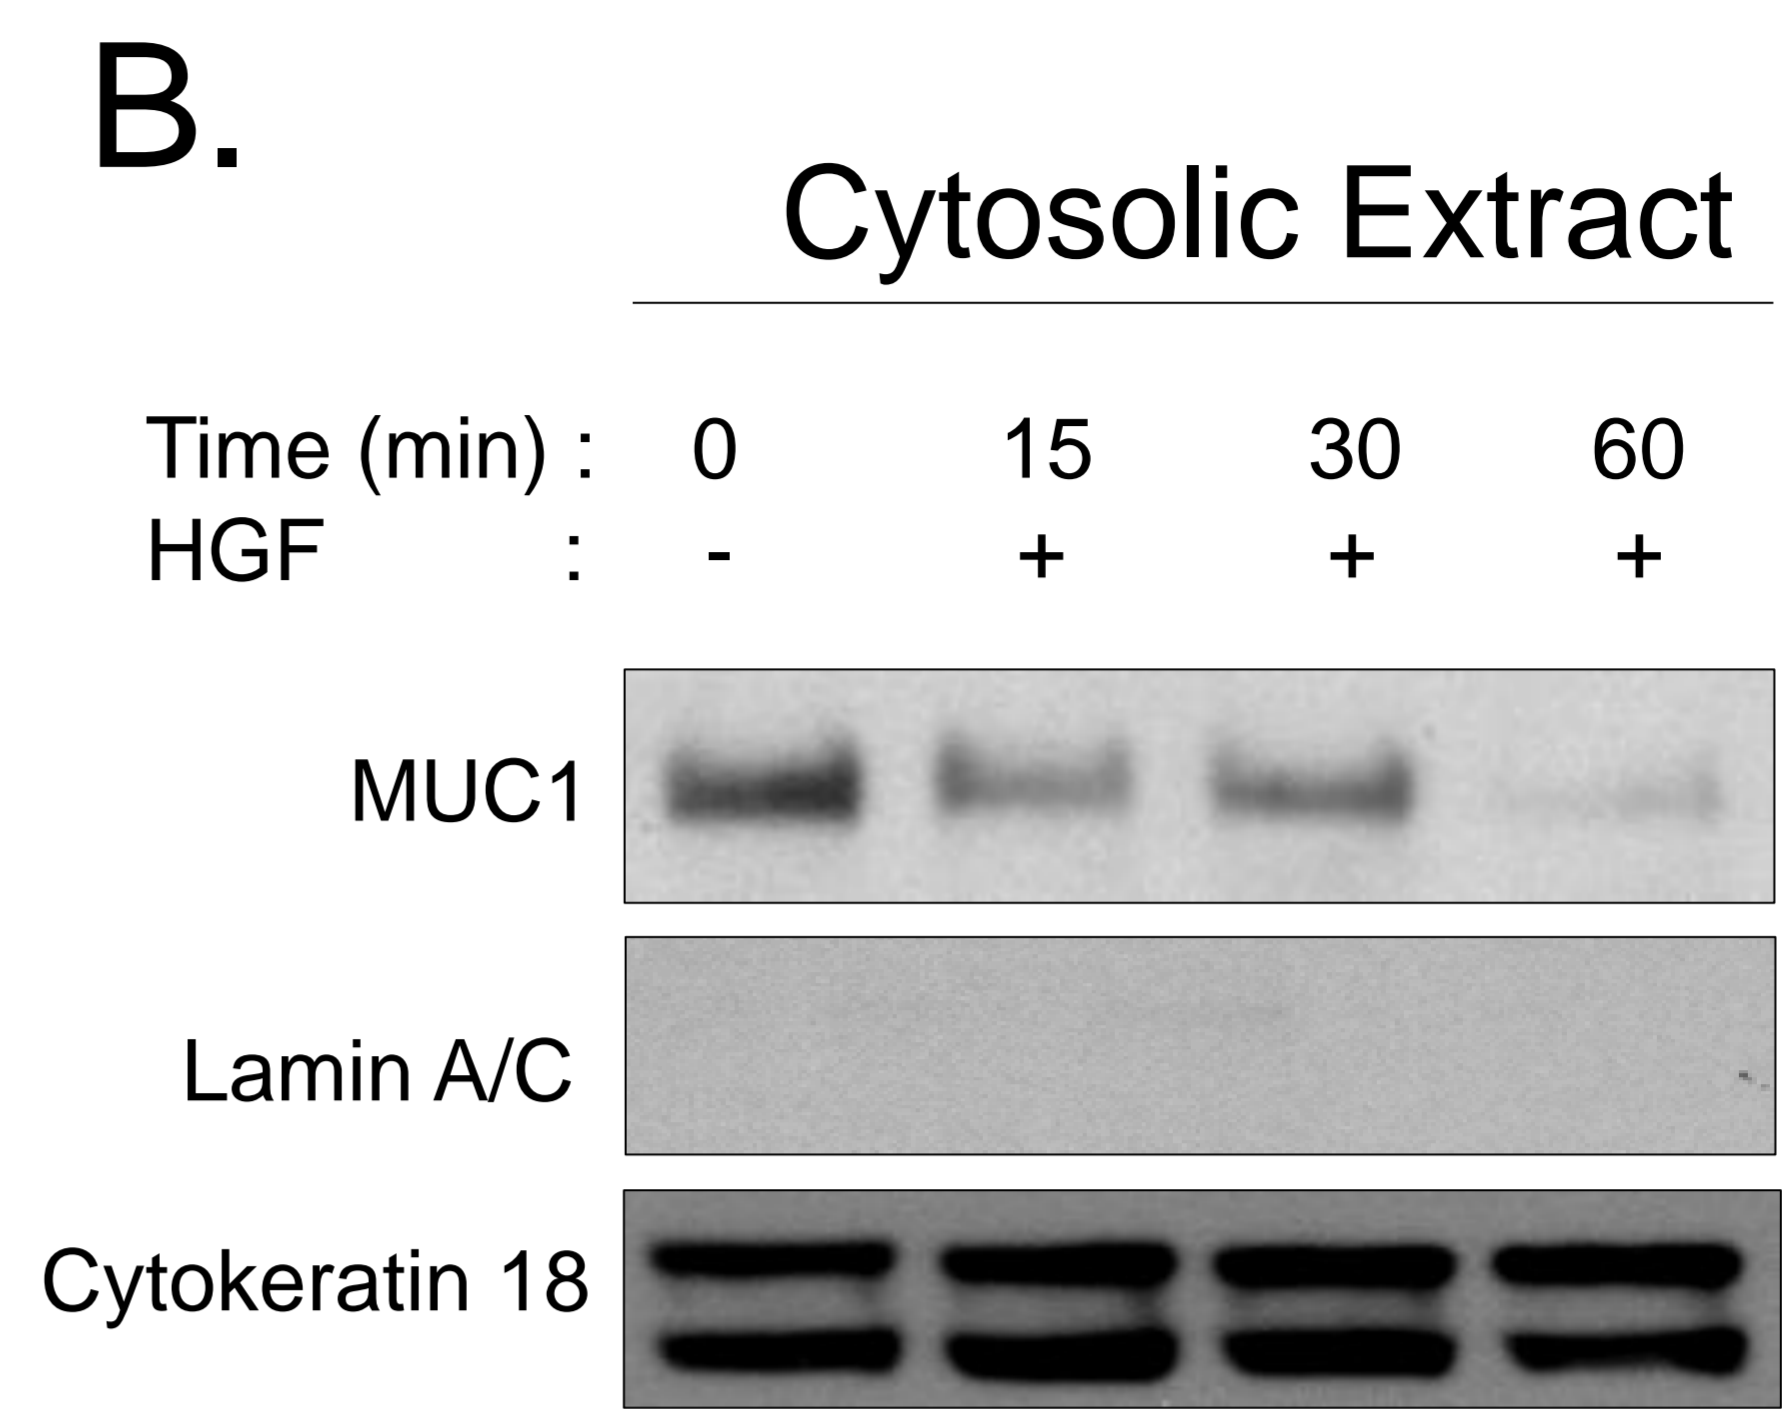

Supplementary Figure 2
